# Supplementary material for: Transcriptome and Genome Size Analysis of the Venus Flytrap
Source: PubMed Central journal article supplement (PMC4401711; doi:10.1371/journal.pone.0123887), 2015-04-17
Supplement: pone.0123887.s004.pdf [file pone.0123887.s004.pdf]

**Supplementary file S4**

>DmACT7\_II 1394 bp

TCGTCATCTCACTCTGCAGGTATATAGAGA**ATGGCCGATGCTGAGGAGATTCAACCTCTTGTCTGTGAC**  
AATGGA**ACTGGTATGGTGAAGGCTGGGTTT**GCTGGCGATGATGCTCCTAGGGCAGTGTTTTCCAGTATT  
GTTGGGCGTCCCAGGCACACAGGTGTGATGGTTGGTATGGGACAGAAGGATGCTTATGTGGGTGATGAA  
GCTCAATCTAAAAGAGGTATCCTTACCTT**GAAATACCCCAT**TGAGCATGG**CATTGTCAGCAACTGGGAT**  
**GACATGGAGAAGATCTGGCATCACACTTTCTACAACGAGCTCCGTGTTGCTCCTGAGGAGCATCCGGTG**  
CTTCTAACTGAGGCTCCTCTCAACCC**TAAGGCAAACAGGGAAAAGATGACTCAAATCATGTTTGAGACA**  
TTCAATGTC**CCCTGCCATGTATGTTGCTATCCAGGCTGTTCTTTCTCTCTATGCCAGTGGTCGTACAACG**  
GGTATCGTGT**TGGACTG**GGTGTGAGT**GCACACTGTCCCATTTATGAAGTTATGCAC**TTCC  
CATGCTATCCTTCGGCTGGACCTT**GCTGGCCGCGACCTCACTGATTCTCTTATGAAGATTCTTACCGAG**  
AGGGGCTACATGTT**CACAACCACTGCTGAACGGGAAAATTGTT**CGCGACATCAAGGAGAAGCTTGCATAT  
GTAGCTCTT**GACTATGAGCAGGAGCTGGAAA**ACTGCCAAGAGCAGCAAGTTATTACCATAGGGGCTGAGA  
GGTT**CAGATGCCCTGAAGTTCTCTTCCAGCCTTCTTTGATTGGGATGGAAGC**TGCTGGCATT**CATGAGA**  
CAACCTACAATTCTATCATGAAGT**GCGACGTTGATATCAGGAAGGACTTGTATGGTAACATCGTGCTTA**  
GTGGTGGTTCT**ACTATGTTCCCTGGCATTGC**CAGACAGGATGAGCAAGGAAATCACAGCACTTGC**TCCAA**  
GCAGCATGAAGATCAAGGTGGTTGCTCCTCCAGAGAGGAAAATACAGTGTCTGGATTGGAGGATCAATCC  
TTGCATCTCTCAGCACCTTCCAACAGATGTGGATT**TCCAAGGGCGAGTACGATGAGTCTGGTCCATCCA**  
TTGTCCACAGGAAATGCTTCTAAGCTCTACAGGATGCTTCGAGGG**TGA**GAGTCCAATATTTTCTTTAGT  
TGCCTTGTGTGTCAAGTGT**CATGA**ACTCGATT**CGGTTGAGCTGGAGGATCACGTTGGGTGTGGGTCAT**  
TGGAAGAAGGG**tggtgccttgatatgctt**ggtatatcaaatatccttcttccagctttcatggaaagtg  
cttgatggtactgcatatTTTTT**accttctgtgagctggctcctcacgtagcttttcgcatggctcgact**  
agtgcttgctgtaga

Inner forward primer: tctttgattgggatggaagc

Inner reverse primer: gcaatgccagggaaacatagt

Outer forward primer: cattgtcagcaactgggatg

Outer reverse primer: aagcatatcaagggcacacc
